# Supplementary material for: A facile synthesis of highly efficient In2S3 photocatalysts for the removal of cationic dyes with size-dependent photocatalysis
Source: Royal Society of Chemistry journal article supplement (doi:10.1039/d2ra07108h), 2023-01-01
Supplement: d2ra07108h1.pdf [file d2ra07108h1.pdf]

## Electronic Supplementary Information

### Facile synthesis of high-efficient In<sub>2</sub>S<sub>3</sub> photocatalysts for the removal of dye with size-dependent photocatalysis

Chaofan Zheng <sup>a,†</sup>, Ziyao Wang <sup>a,†</sup>, Jialong Yuan <sup>a</sup>, Qingfeng Xu <sup>a</sup>, Haixin Li <sup>a</sup>, Xiaoyi Lu <sup>a</sup>, Jiangang Gao <sup>a,b,\*</sup> and Wenjin Yue <sup>a,b,\*</sup>

<sup>a</sup> School of Chemical and Environmental Engineering, Anhui Polytechnic University, Wuhu, 241000, P. R. China

<sup>b</sup> Anhui Laboratory of Clean Energy Materials and Chemistry for Sustainable Conversion of Natural Resources, Wuhu, 241000, P. R. China

\*Corresponding author.

Email address: gaojiangang@ahpu.edu.cn (Jiangang Gao)

yuewenjin\_79@163.com (Wenjin Yue)

<sup>†</sup> These authors contributed equally to this work.

#### S1. Photocatalysis experiments

In<sub>2</sub>S<sub>3</sub>-5, In<sub>2</sub>S<sub>3</sub>-10 and In<sub>2</sub>S<sub>3</sub>-15 were suspended in rhodamine B (RhB) solution to obtain the suspension with the concentration of 60 mg/L, respectively. Then the suspension was kept in the dark for 30 min to reach the adsorbed equilibrium before the photoreaction. Artificial solar light used 300 W Xenon lamp (PLS-SXE 300, Beijing Trusttech Co. Ltd., China) loaded with Cut 420 filter which emitted visible light in 400–780 nm. The distance between Xenon lamp and the suspension was 10 cm away, getting the intensity approximately constant at 220 mW/cm<sup>2</sup>. 3 mL suspension was taken out and centrifuged to remove In<sub>2</sub>S<sub>3</sub> particles at intervals, the filtrates were tested by UV-vis absorption spectrum to record the variation of the maximum absorption band of RhB at  $\lambda=554$  nm. Moreover, the photodegradation of crystal violet (CV), malachite green (MG), methyl orange (MO), congo red (CR) and acid red (AR) with In<sub>2</sub>S<sub>3</sub>-10 were carried out as the similar procedure, except that the maximum

absorption band of CV at  $\lambda=590$  nm, MG at  $\lambda=617$  nm, MO at  $\lambda=465$  nm, CR at  $\lambda=498$  nm and AR at  $\lambda=511$  nm.

## S2. Electrochemical measurements

In electrochemical experiments, Pt wire and saturated calomel electrode (SCE) electrode were used as the counter electrode and reference electrode, respectively. Cyclic voltammetry (C-V) measurement was carried out in  $N_2$  atmosphere at a scan rate of 50 mV/s with tetrabutylammonium perchlorate dissolved in acetonitrile (0.1 M) as the supporting electrolyte. 4 mg  $In_2S_3$  was dispersed in the mixed solvent containing 1.5 mL deionized water and 0.5 mL ethanol to carry out ultrasound treatment for 60 min followed by the addition of 60  $\mu$ L Nafion glue. Dry *ca.* 15-20  $\mu$ L mixture on carbon substrate to make the working electrode for C-V measurement. In linear sweep voltammetry (LSV), transient photocurrent-time ( $I-t$ ) curves and electrochemical impedance spectroscopy (EIS) measurements, the working electrodes were prepared as follows. 5 mg  $In_2S_3$  which dispersed in the mixed solvent containing 0.5 mL water and 0.5 mL alcohol had a ultrasound treatment for 120 min, followed by 20 mL Nafion glue adding into the mixture, then *ca.* 300-400  $\mu$ L mixture was dried on ITO conductive glass. 0.5 M  $Na_2SO_4$  aqueous solution was used as the electrolyte. 300 W Xe lamp with an optical cut-off filter ( $\lambda \geq 420$  nm) was used as the light source. EIS measurement was carried out at open circuit potential in  $10^5$ - $10^{-2}$  Hz frequency range.

## S3. Calculation of band edge potential based on empirical equation and C-V measurement

Based on the value of  $E_{g-O}$ , the valence band edge potential ( $E_{VB}$ ) of a semiconductor at the point of zero charge can be calculated by the following empirical equation:  $E_{VB} = X - E^e + 0.5E_{g-O}$ , where  $X$  is the electronegativity of the semiconductor (the value for  $In_2S_3$  is 4.7 eV),  $E^e$  is the energy of free electrons on the hydrogen scale ( $\sim 4.5$  eV). Furthermore, the conduction band edge potential ( $E_{CB}$ ) can be determined by  $E_{CB} = E_{VB} - E_{g-O}$ . The calculated results of different  $In_2S_3$  are shown as Table 1 in main body.

C-V measurements are also helpful for determination of the ionization potential ( $IP$ ) and the electron affinity ( $EA$ ) of nanoparticles that are equal to  $E_{VB}$  and  $E_{CB}$ . With SCE reference electrode, it is expected that the nanoparticles have  $IP = -(E_{ox} + 0.245)$  eV and  $EA = -(E_{red} + 0.245)$  eV, where  $E_{ox}$  and  $E_{red}$  are the onset potentials of oxidation and reduction peaks. The value of 0.245 was the potential

of SCE electrode versus the normal hydrogen electrode (NHE). The results of different  $\text{In}_2\text{S}_3$  are shown as Table 1 in main body.
